# Supplementary material
Source: Springer Nature journal article supplement (https://www.springermedizin.de/resource/supplementary/12891_2006_340_MOESM3_ESM.pdf/9511094)

# Local Anesthetic Types used for Shoulder Injections

(A-C Joint and S-A Bursa)

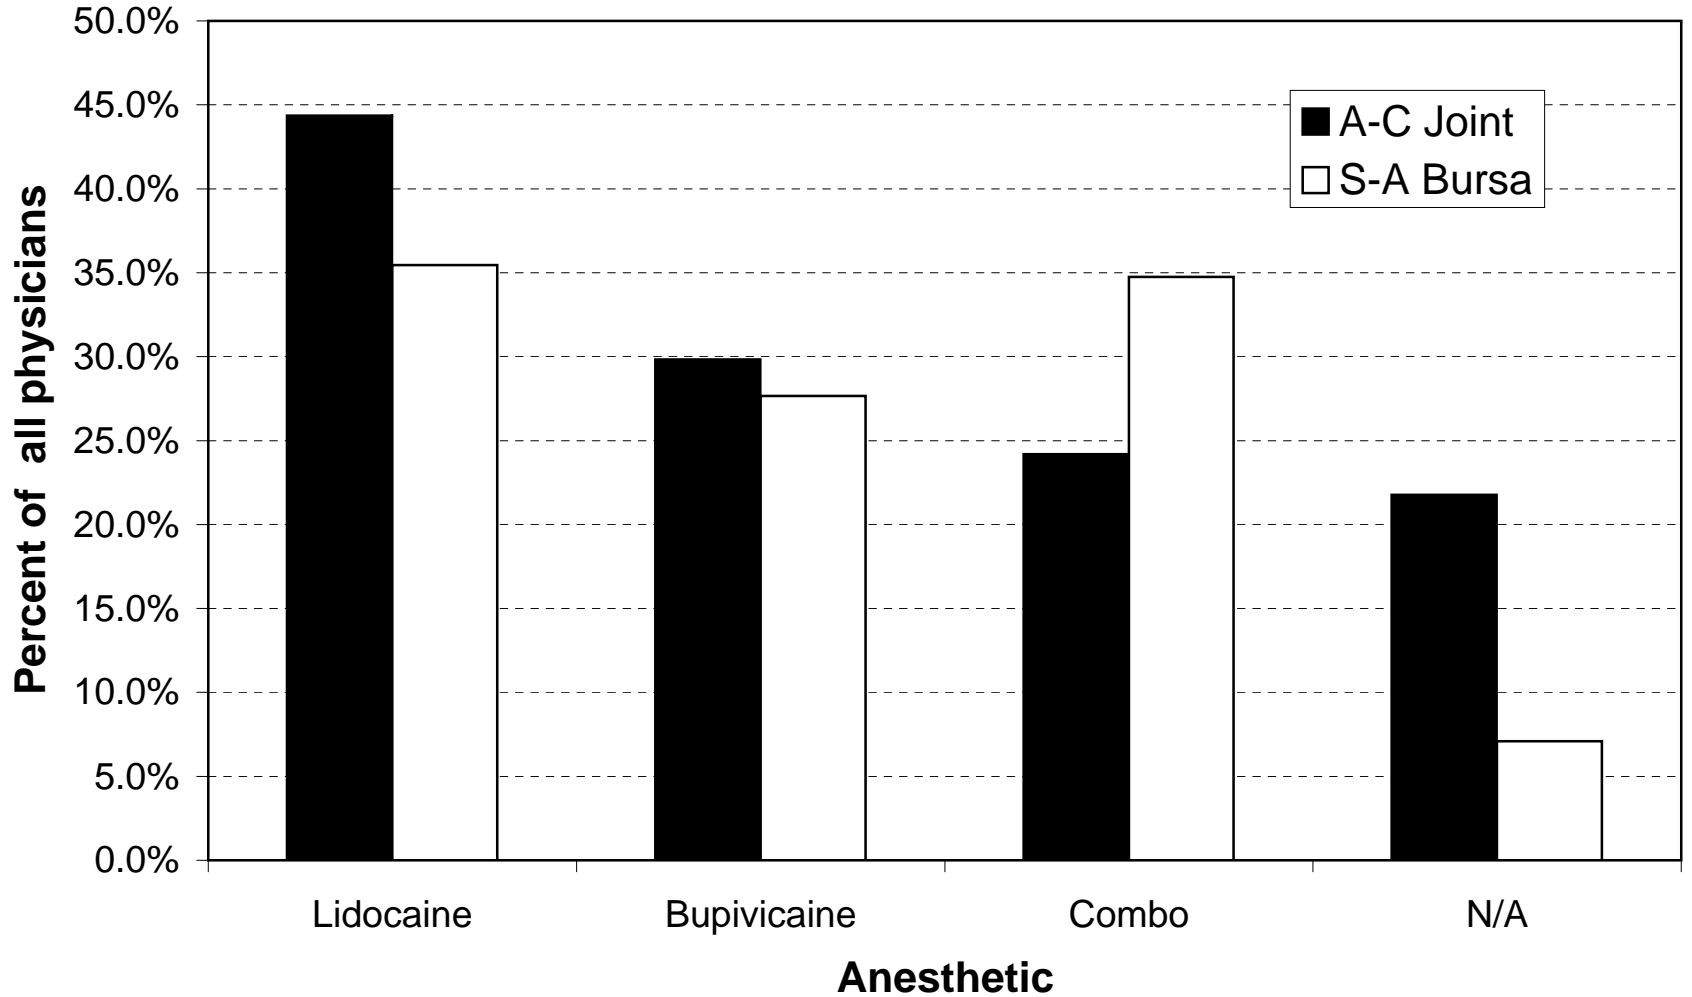

Supplement: MOESM3 [file 9511094]
